# Supplementary material for: Neuroplasticity Elicited by Modified Pharyngeal Electrical Stimulation: A Pilot Study
Source: MDPI journal article supplement (doi:10.3390/brainsci13010119), 2023-01-10
Supplement: s1 [file s1]

**Supplementary Figure 1. Pipeline of data pre-processing by Homer2.**

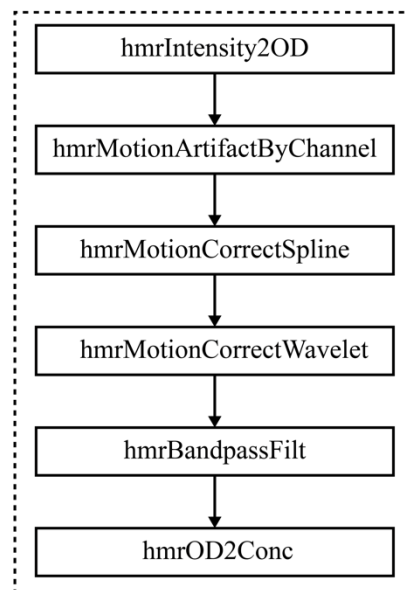

**Supplementary Table 1. Channels excluded for Experiment 1.**

| Participant# | Excluded channel# (Experiment 1)                  |
|--------------|---------------------------------------------------|
| 1            | 14                                                |
| 3            | 4, 12                                             |
| 4            | 12                                                |
| 5            | 4, 24, 48                                         |
| 8            | 32                                                |
| 9            | 11, 12, 57                                        |
| 10           | 3, 4, 5, 8, 9, 11, 12, 18, 19, 24, 26, 28, 40, 55 |
| 12           | 28                                                |
| 13           | 27, 32, 36, 38, 54, 55, 57                        |
| 15           | 11, 12, 26, 44, 54, 56, 57                        |
| 18           | 40                                                |
| 19           | 50                                                |

**Note:** Channel# 42, 43, 58, 59, 60, 61, 62, 63 located in occipital areas were excluded for all analysis, which is not listed in the table (the same in Supplementary Table 2).

**Supplementary Table 2. Channels excluded for Experiment 2.**

| Participant# | Excluded channel# (Experiment 2)   |                                        |
|--------------|------------------------------------|----------------------------------------|
|              | Pre                                | Post                                   |
| 1            | 5, 6, 7, 22, 24                    |                                        |
| 3            | 12                                 |                                        |
| 4            | 13, 56, 57                         |                                        |
| 5            |                                    | 12, 13, 14, 15                         |
| 6            | 23, 31, 33, 34, 36, 50, 51, 56, 57 | 12, 31, 33, 35, 36, 40, 41, 50, 51, 54 |

|   |  |    |
|---|--|----|
| 7 |  | 12 |
|---|--|----|
